# Supplementary material
Source: PubMed Central journal article supplement (PMC4194228)
Supplement: NIHMS585677-supplement-01.pdf [file NIHMS585677-supplement-01.pdf]

Table 1: The non-linear correlation between (i) measurement gap and numerical value and (ii) measurement gap and change in numerical value, for 70 laboratory tests. The measurement gap and numerical value correlations are calculated on three different time scales (full time scale, short time scale, long time scale). The following results are reported: the mutual information (MI), the confidence intervals for the MI results (CI of MI) and the MI total (which is the confidence interval subtracted from the MI). In addition, we calculated the ergodicity for every laboratory test measured via the Kolgomorov-Smirnov statistic and the result was 1, the same for all laboratory tests, and is therefore not shown.

| <b>Nonlinear Correlations between Laboratory Test Numerical Values and Time Between Measurement</b> |           |                 |                 |            |                  |                  |           |                 |                 |            |                  |                  |          |
|-----------------------------------------------------------------------------------------------------|-----------|-----------------|-----------------|------------|------------------|------------------|-----------|-----------------|-----------------|------------|------------------|------------------|----------|
| Laboratory Test                                                                                     | MI (full) | CI of MI (full) | MI total (full) | MI (short) | CI of MI (short) | MI total (short) | MI (long) | CI of MI (long) | MI total (long) | MI (dv/dt) | CI of MI (dv/dt) | MI total (dv/dt) | Total MI |
| 25-OH                                                                                               |           |                 |                 |            |                  |                  |           |                 |                 |            |                  |                  |          |
| Vitamin D                                                                                           | 0.043     | 0.035           | 0.007           | 1.847      | 1.842            | 0.005            | 0.052     | 0.042           | 0.010           | 0.059      | 0.032            | 0.027            | 0.027    |
| Albumin                                                                                             | 0.154     | 0.001           | 0.153           | 0.045      | 0.004            | 0.041            | 0.051     | 0.001           | 0.050           | 0.020      | 0.001            | 0.019            | 0.019    |
| Alkaline Phosphatase                                                                                | 0.038     | 0.001           | 0.037           | 0.012      | 0.005            | 0.007            | 0.023     | 0.002           | 0.021           | 0.010      | 0.001            | 0.008            | 0.008    |
| ALT                                                                                                 | 0.037     | 0.001           | 0.036           | 0.012      | 0.005            | 0.007            | 0.014     | 0.002           | 0.012           | 0.009      | 0.001            | 0.008            | 0.008    |
| Amylase                                                                                             | 0.089     | 0.017           | 0.072           | 0.077      | 0.060            | 0.017            | 0.032     | 0.019           | 0.012           | 0.052      | 0.017            | 0.034            | 0.034    |

Continued on next page

| Laboratory Test      | MI (full) | CI of MI (full) | MI total (full) | MI (short) | CI of MI (short) | MI total (short) | MI (long) | CI of MI (long) | MI total (long) | MI (dv/dt) | CI of MI (dv/dt) | Total MI (dv/dt) |
|----------------------|-----------|-----------------|-----------------|------------|------------------|------------------|-----------|-----------------|-----------------|------------|------------------|------------------|
| AST                  | 0.062     | 0.001           | 0.061           | 0.016      | 0.005            | 0.011            | 0.019     | 0.002           | 0.018           | 0.023      | 0.001            | 0.022            |
| Base Excess Arterial | 0.029     | 0.017           | 0.012           | 0.025      | 0.019            | 0.007            | 0.102     | 0.085           | 0.017           | 0.058      | 0.020            | 0.038            |
| Basophiles %         | 0.002     | 0.000           | 0.001           | 0.003      | 0.002            | 0.001            | 0.002     | 0.000           | 0.002           | 0.004      | 0.001            | 0.003            |
| Bicarbonate Arterial | 0.040     | 0.001           | 0.040           | 0.024      | 0.001            | 0.023            | 0.010     | 0.001           | 0.009           | 0.010      | 0.001            | 0.010            |
| Bilirubin Direct     | 0.083     | 0.001           | 0.082           | 0.022      | 0.005            | 0.017            | 0.020     | 0.002           | 0.019           | 0.050      | 0.003            | 0.047            |
| Bilirubin Total      | 0.063     | 0.001           | 0.061           | 0.019      | 0.006            | 0.013            | 0.013     | 0.002           | 0.011           | 0.021      | 0.002            | 0.019            |
| Blood Protein        | 0.120     | 0.001           | 0.119           | 0.050      | 0.004            | 0.046            | 0.034     | 0.001           | 0.032           | 0.022      | 0.001            | 0.021            |
| BNP                  | 0.100     | 0.075           | 0.026           | 0.514      | 0.520            | -0.005           | 0.097     | 0.082           | 0.015           | 0.071      | 0.066            | 0.005            |
| BUN                  | 0.057     | 0.001           | 0.056           | 0.016      | 0.001            | 0.015            | 0.035     | 0.001           | 0.034           | 0.031      | 0.001            | 0.030            |
| Calcium              | 0.110     | 0.001           | 0.109           | 0.020      | 0.001            | 0.019            | 0.016     | 0.001           | 0.015           | 0.011      | 0.001            | 0.010            |
| Calcium Ionized      | 0.023     | 0.012           | 0.011           | 0.024      | 0.014            | 0.010            | 0.048     | 0.036           | 0.012           | 0.025      | 0.011            | 0.014            |
| CEA                  | 0.093     | 0.066           | 0.027           | 0.870      | 0.897            | -0.027           | 0.103     | 0.078           | 0.025           | 0.067      | 0.062            | 0.005            |
| Chloride             | 0.039     | 0.000           | 0.038           | 0.011      | 0.001            | 0.010            | 0.012     | 0.001           | 0.012           | 0.006      | 0.000            | 0.006            |
| Cholesterol          | 0.024     | 0.002           | 0.022           | 0.051      | 0.026            | 0.025            | 0.016     | 0.002           | 0.014           | 0.021      | 0.002            | 0.019            |
| CK                   | 0.034     | 0.004           | 0.030           | 0.023      | 0.014            | 0.008            | 0.011     | 0.006           | 0.005           | 0.019      | 0.005            | 0.014            |

Continued on next page

| Laboratory Test            | MI (full) | CI of MI (full) | MI total (full) | MI (short) | CI of MI (short) | MI total (short) | MI (long) | CI of MI (long) | MI total (long) | MI (dv/dt) | CI of MI (dv/dt) | Total MI (dv/dt) |
|----------------------------|-----------|-----------------|-----------------|------------|------------------|------------------|-----------|-----------------|-----------------|------------|------------------|------------------|
| CK-MB                      | 0.106     | 0.112           | -0.006          | 0.177      | 0.152            | 0.025            | 0.147     | 0.160           | -0.013          | 0.102      | 0.098            | 0.005            |
| Creatinine                 | 0.060     | 0.001           | 0.059           | 0.025      | 0.002            | 0.024            | 0.033     | 0.001           | 0.032           | 0.045      | 0.001            | 0.043            |
| CRP                        |           |                 |                 |            |                  |                  |           |                 |                 |            |                  |                  |
| High Sensitivity           | 0.069     | 0.034           | 0.035           | 0.636      | 0.584            | 0.052            | 0.060     | 0.039           | 0.021           | 0.046      | 0.033            | 0.012            |
| ESR                        | 0.052     | 0.014           | 0.038           | 0.352      | 0.393            | -0.041           | 0.048     | 0.015           | 0.033           | 0.020      | 0.014            | 0.006            |
| Ferritin                   | 0.066     | 0.016           | 0.050           | 0.400      | 0.390            | 0.010            | 0.066     | 0.019           | 0.048           | 0.037      | 0.016            | 0.021            |
| Folic Acid                 | 0.109     | 0.088           | 0.022           | 1.375      | 1.432            | -0.056           | 0.123     | 0.096           | 0.028           | 0.096      | 0.077            | 0.019            |
| Glucose                    |           |                 |                 |            |                  |                  |           |                 |                 |            |                  |                  |
| Whole Blood                | 0.034     | 0.001           | 0.033           | 0.023      | 0.002            | 0.022            | 0.012     | 0.001           | 0.010           | 0.015      | 0.001            | 0.014            |
| HCT                        | 0.118     | 0.001           | 0.117           | 0.021      | 0.001            | 0.019            | 0.050     | 0.001           | 0.049           | 0.012      | 0.001            | 0.011            |
| HDL                        | 0.011     | 0.003           | 0.008           | 0.252      | 0.247            | 0.006            | 0.010     | 0.003           | 0.007           | 0.009      | 0.002            | 0.007            |
| Hemoglobin                 | 0.111     | 0.001           | 0.110           | 0.017      | 0.001            | 0.015            | 0.051     | 0.001           | 0.050           | 0.014      | 0.001            | 0.013            |
| Hemoglobin A <sub>1c</sub> | 0.057     | 0.005           | 0.052           | 0.518      | 0.540            | -0.022           | 0.058     | 0.005           | 0.053           | 0.023      | 0.004            | 0.019            |
| Homocysteine               | 0.206     | 0.159           | 0.048           | 1.521      | 1.578            | -0.058           | 0.246     | 0.192           | 0.054           | 0.111      | 0.115            | -0.003           |
| Iron                       | 0.037     | 0.021           | 0.016           | 0.485      | 0.485            | 0.000            | 0.039     | 0.023           | 0.016           | 0.030      | 0.020            | 0.010            |
| LDH                        | 0.058     | 0.006           | 0.052           | 0.030      | 0.023            | 0.007            | 0.028     | 0.008           | 0.020           | 0.021      | 0.006            | 0.015            |
| LDL                        | 0.015     | 0.003           | 0.012           | 0.280      | 0.307            | -0.026           | 0.015     | 0.003           | 0.012           | 0.015      | 0.003            | 0.013            |

Continued on next page

| Laboratory Test                | MI (full) | CI of MI (full) | MI total (full) | MI (short) | CI of MI (short) | MI total (short) | MI (long) | CI of MI (long) | MI total (long) | MI (dv/dt) | CI of MI (dv/dt) | Total MI (dv/dt) |
|--------------------------------|-----------|-----------------|-----------------|------------|------------------|------------------|-----------|-----------------|-----------------|------------|------------------|------------------|
| Lipase                         | 0.127     | 0.018           | 0.109           | 0.077      | 0.060            | 0.017            | 0.034     | 0.016           | 0.018           | 0.052      | 0.017            | 0.034            |
| Lymphocytes %                  | 0.062     | 0.002           | 0.060           | 0.013      | 0.009            | 0.004            | 0.029     | 0.002           | 0.027           | 0.015      | 0.002            | 0.013            |
| Magnesium                      | 0.020     | 0.002           | 0.018           | 0.016      | 0.002            | 0.013            | 0.031     | 0.005           | 0.025           | 0.015      | 0.002            | 0.013            |
| MCH                            | 0.009     | 0.001           | 0.008           | 0.003      | 0.002            | 0.002            | 0.011     | 0.001           | 0.010           | 0.014      | 0.000            | 0.013            |
| MCHC                           | 0.010     | 0.000           | 0.009           | 0.005      | 0.001            | 0.004            | 0.010     | 0.001           | 0.010           | 0.012      | 0.000            | 0.011            |
| MCV                            | 0.008     | 0.001           | 0.007           | 0.003      | 0.002            | 0.001            | 0.011     | 0.001           | 0.010           | 0.041      | 0.001            | 0.040            |
| Microalbumin /Creatinine Ratio | 0.034     | 0.022           | 0.011           | 1.319      | 1.249            | 0.070            | 0.039     | 0.030           | 0.009           | 0.029      | 0.021            | 0.008            |
| Monocytes %                    | 0.017     | 0.001           | 0.016           | 0.012      | 0.007            | 0.005            | 0.014     | 0.002           | 0.012           | 0.009      | 0.002            | 0.006            |
| MPV                            | 0.009     | 0.001           | 0.009           | 0.003      | 0.002            | 0.002            | 0.010     | 0.001           | 0.009           | 0.029      | 0.001            | 0.028            |
| NRBC %                         | 0.059     | 0.017           | 0.042           | 0.027      | 0.020            | 0.006            | 0.120     | 0.058           | 0.063           | 0.072      | 0.013            | 0.060            |
| NRBC Abso-lute                 | 0.022     | 0.014           | 0.008           | 0.018      | 0.016            | 0.001            | 0.078     | 0.063           | 0.015           | 0.016      | 0.013            | 0.003            |
| PCO <sub>2</sub> , Arterial    | 0.014     | 0.011           | 0.003           | 0.014      | 0.011            | 0.002            | 0.078     | 0.066           | 0.013           | 0.036      | 0.010            | 0.027            |
| PCO <sub>2</sub> , Venous      | 0.089     | 0.053           | 0.036           | 0.139      | 0.107            | 0.032            | 0.098     | 0.087           | 0.011           | 0.082      | 0.040            | 0.042            |
| pH Arterial                    | 0.016     | 0.006           | 0.010           | 0.016      | 0.007            | 0.009            | 0.056     | 0.048           | 0.008           | 0.027      | 0.004            | 0.023            |
| pH Urine                       | 0.006     | 0.001           | 0.005           | 0.007      | 0.008            | -0.001           | 0.006     | 0.001           | 0.005           | 0.006      | 0.003            | 0.003            |

Continued on next page

| Laboratory Test          | MI (full) | CI of MI (full) | MI total (full) | MI (short) | CI of MI (short) | MI total (short) | MI (long) | CI of MI (long) | MI total (long) | MI (dv/dt) | CI of MI (dv/dt) | Total MI (dv/dt) |
|--------------------------|-----------|-----------------|-----------------|------------|------------------|------------------|-----------|-----------------|-----------------|------------|------------------|------------------|
| pH Venous                | 0.073     | 0.046           | 0.027           | 0.123      | 0.092            | 0.031            | 0.076     | 0.072           | 0.004           | 0.062      | 0.040            | 0.022            |
| Phosphorus               | 0.026     | 0.002           | 0.024           | 0.012      | 0.003            | 0.009            | 0.019     | 0.004           | 0.015           | 0.015      | 0.002            | 0.013            |
| Platelet Count           | 0.041     | 0.001           | 0.040           | 0.019      | 0.002            | 0.017            | 0.021     | 0.001           | 0.020           | 0.027      | 0.001            | 0.026            |
| PO <sub>2</sub> Arterial | 0.055     | 0.011           | 0.043           | 0.035      | 0.012            | 0.023            | 0.084     | 0.062           | 0.022           | 0.031      | 0.011            | 0.021            |
| PO <sub>2</sub> Venous   | 0.197     | 0.056           | 0.140           | 0.128      | 0.096            | 0.032            | 0.121     | 0.098           | 0.023           | 0.211      | 0.054            | 0.157            |
| Potassium                | 0.035     | 0.001           | 0.034           | 0.027      | 0.001            | 0.025            | 0.012     | 0.001           | 0.011           | 0.021      | 0.001            | 0.020            |
| PSA Screening            | 0.124     | 0.022           | 0.103           | 0.745      | 0.773            | -0.028           | 0.130     | 0.027           | 0.102           | 0.061      | 0.023            | 0.038            |
| PTH                      | 0.094     | 0.038           | 0.056           | 0.980      | 1.010            | -0.030           | 0.098     | 0.044           | 0.053           | 0.052      | 0.033            | 0.018            |
| RBC                      | 0.104     | 0.001           | 0.103           | 0.020      | 0.002            | 0.018            | 0.049     | 0.001           | 0.047           | 0.012      | 0.001            | 0.011            |
| RDW                      | 0.051     | 0.001           | 0.050           | 0.005      | 0.002            | 0.003            | 0.042     | 0.001           | 0.040           | 0.019      | 0.001            | 0.018            |
| Sodium                   | 0.043     | 0.001           | 0.042           | 0.012      | 0.001            | 0.011            | 0.008     | 0.001           | 0.007           | 0.005      | 0.000            | 0.004            |
| T4                       | 0.061     | 0.016           | 0.044           | 0.560      | 0.600            | -0.040           | 0.064     | 0.018           | 0.045           | 0.026      | 0.015            | 0.011            |
| T4 Free                  | 0.054     | 0.028           | 0.027           | 0.802      | 0.807            | -0.005           | 0.057     | 0.031           | 0.025           | 0.042      | 0.026            | 0.016            |
| TIBC                     | 0.073     | 0.021           | 0.052           | 0.685      | 0.662            | 0.023            | 0.070     | 0.023           | 0.047           | 0.037      | 0.018            | 0.019            |
| Triglycerides            | 0.017     | 0.003           | 0.014           | 0.226      | 0.215            | 0.011            | 0.016     | 0.003           | 0.013           | 0.008      | 0.003            | 0.005            |
| Troponin                 | 0.034     | 0.019           | 0.014           | 0.030      | 0.024            | 0.006            | 0.043     | 0.038           | 0.005           | 0.031      | 0.020            | 0.012            |
| TSH                      | 0.059     | 0.005           | 0.054           | 0.175      | 0.167            | 0.008            | 0.060     | 0.006           | 0.054           | 0.046      | 0.005            | 0.041            |
| Uric Acid                | 0.029     | 0.006           | 0.023           | 0.045      | 0.025            | 0.020            | 0.023     | 0.008           | 0.015           | 0.031      | 0.006            | 0.025            |
| Vitamin B <sub>12</sub>  | 0.066     | 0.044           | 0.022           | 1.224      | 1.224            | 0.000            | 0.072     | 0.048           | 0.024           | 0.052      | 0.037            | 0.015            |

Continued on next page

| Laboratory Test | MI (full) | CI of MI (full) | MI total (full) | MI (short) | CI of MI (short) | MI total (short) | MI (long) | CI of MI (long) | MI total (long) | MI (dv/dt) | CI of MI (dv/dt) | Total MI (dv/dt) |
|-----------------|-----------|-----------------|-----------------|------------|------------------|------------------|-----------|-----------------|-----------------|------------|------------------|------------------|
| WBC             | 0.057     | 0.001           | 0.056           | 0.010      | 0.002            | 0.008            | 0.018     | 0.001           | 0.017           | 0.008      | 0.001            | 0.007            |

Table 2: The linear correlations (LC) and p-values of 70 laboratory tests, calculated on both the short and long time scale. A positive linear correlation indicates that a higher laboratory test value is correlated to a longer time until next measurement and a negative linear correlation indicates that a higher laboratory test value is correlated to a shorter time until next measurement. The linear correlation across the full time scale is not shown as it was very close to 0 for every laboratory test (all p-values for the full time scale linear correlations were statistically significant - except for the Vitamin B<sub>12</sub> test.)

| <b>Linear Correlations between Laboratory Test Values and Measurement Gap</b> |            |                       |           |                      |
|-------------------------------------------------------------------------------|------------|-----------------------|-----------|----------------------|
| Laboratory Test                                                               | LC (Short) | p-value of LC (Short) | LC (Long) | p-value of LC (Long) |
| 25-OH Vitamin D                                                               | 0.200      | 2.28E-01              | 0.053     | 2.63E-05             |
| Albumin                                                                       | -0.029     | 2.87E-11              | 0.296     | 0.00E+00             |
| Alkaline Phosphatase                                                          | 0.033      | 2.44E-14              | -0.177    | 0.00E+00             |
| ALT                                                                           | -0.050     | 4.52E-31              | -0.129    | 0.00E+00             |
| Amylase                                                                       | -0.083     | 3.58E-08              | -0.111    | 3.65E-36             |
| AST                                                                           | -0.108     | 3.74E-135             | -0.148    | 0.00E+00             |
| Base Excess Arterial                                                          | 0.066      | 3.58E-13              | -0.123    | 3.06E-10             |
| Basophiles %                                                                  | 0.020      | 1.15E-01              | -0.048    | 2.32E-23             |
| Bicarbonate Arterial                                                          | 0.181      | 0.00E+00              | 0.103     | 0.00E+00             |
| Bilirubin Direct                                                              | -0.050     | 4.30E-28              | -0.169    | 0.00E+00             |
| Bilirubin Total                                                               | -0.055     | 3.54E-32              | -0.121    | 0.00E+00             |
| Blood Protein                                                                 | 0.030      | 3.09E-11              | 0.195     | 0.00E+00             |
| BNP                                                                           | 0.037      | 5.10E-01              | -0.127    | 2.04E-12             |
| BUN                                                                           | -0.156     | 0.00E+00              | -0.208    | 0.00E+00             |
| Calcium                                                                       | 0.098      | 0.00E+00              | 0.115     | 0.00E+00             |
| Calcium Ionized                                                               | 0.057      | 3.87E-11              | -0.071    | 4.57E-08             |
| CEA                                                                           | 0.023      | 9.08E-01              | -0.186    | 1.66E-16             |

Continued on next page

| Laboratory Test               | LC (Short) | p-value of LC (Short) | LC (Long) | p-value of LC (Long) |
|-------------------------------|------------|-----------------------|-----------|----------------------|
| Chloride                      | 0.033      | 2.75E-39              | 0.022     | 2.39E-24             |
| Cholesterol                   | -0.160     | 7.80E-59              | -0.005    | 1.01E-01             |
| CK                            | 0.011      | 1.28E-01              | -0.027    | 2.94E-09             |
| CK-MB                         | -0.003     | 9.14E-01              | -0.101    | 2.26E-02             |
| Creatinine                    | -0.208     | 0.00E+00              | -0.186    | 0.00E+00             |
| CRP High Sensitivity          | -0.084     | 1.53E-01              | -0.118    | 2.96E-24             |
| ESR                           | 0.088      | 2.69E-02              | -0.237    | 8.92E-250            |
| Ferritin                      | 0.067      | 2.06E-01              | -0.215    | 2.61E-150            |
| Folic Acid                    | -0.138     | 1.86E-01              | -0.072    | 7.22E-05             |
| Glucose Whole Blood           | -0.150     | 0.00E+00              | -0.093    | 0.00E+00             |
| HCT                           | 0.142      | 0.00E+00              | 0.276     | 0.00E+00             |
| HDL                           | -0.058     | 7.28E-02              | 0.087     | 1.04E-158            |
| Hemoglobin                    | 0.118      | 0.00E+00              | 0.282     | 0.00E+00             |
| Hemoglobin A <sub>1c</sub>    | 0.036      | 4.63E-01              | -0.193    | 0.00E+00             |
| Homocysteine                  | -0.163     | 3.90E-01              | -0.275    | 8.87E-27             |
| Iron                          | 0.135      | 1.08E-02              | 0.106     | 1.71E-34             |
| LDH                           | -0.004     | 6.34E-01              | -0.140    | 6.73E-159            |
| LDL                           | -0.001     | 9.70E-01              | 0.015     | 7.80E-06             |
| Lipase                        | -0.068     | 9.19E-06              | -0.152    | 1.47E-61             |
| Lymphocytes %                 | 0.022      | 1.44E-04              | 0.149     | 0.00E+00             |
| Magnesium                     | -0.083     | 7.73E-149             | 0.167     | 1.80E-322            |
| MCH                           | -0.009     | 2.70E-04              | 0.025     | 7.13E-32             |
| MCHC                          | -0.053     | 1.91E-102             | 0.100     | 0.00E+00             |
| MCV                           | 0.018      | 1.75E-13              | -0.022    | 1.55E-25             |
| Microalbumin/Creatinine Ratio | 0.004      | 9.84E-01              | -0.074    | 9.10E-10             |
| Monocytes %                   | 0.061      | 7.61E-25              | -0.091    | 1.01E-224            |
| MPV                           | -0.003     | 3.15E-01              | 0.078     | 6.38E-257            |

Continued on next page



| Laboratory Test           | LC (Short) | p-value of LC (Short) | LC (Long) | p-value of LC (Long) |
|---------------------------|------------|-----------------------|-----------|----------------------|
| NRBC %                    | 0.038      | 1.66E-05              | -0.087    | 3.86E-10             |
| NRBC Absolute             | -0.023     | 1.14E-02              | -0.044    | 8.37E-03             |
| PCO <sub>2</sub> Arterial | -0.021     | 1.50E-03              | 0.061     | 4.57E-05             |
| PCO <sub>2</sub> , Venous | 0.190      | 5.69E-20              | 0.091     | 3.18E-07             |
| pH Arterial               | 0.100      | 3.74E-51              | -0.109    | 3.64E-13             |
| pH Urine                  | 0.004      | 6.79E-01              | -0.013    | 1.71E-04             |
| pH Venous                 | 0.239      | 5.04E-31              | -0.065    | 2.63E-04             |
| Phosphorus                | -0.042     | 5.40E-36              | -0.092    | 3.31E-136            |
| Platelet Count            | 0.148      | 0.00E+00              | 0.029     | 1.53E-41             |
| PO <sub>2</sub> Arterial  | -0.153     | 3.44E-116             | -0.094    | 3.24E-10             |
| PO <sub>2</sub> Venous    | -0.038     | 6.72E-02              | -0.047    | 8.25E-03             |
| Potassium                 | -0.071     | 8.56E-199             | -0.044    | 6.33E-102            |
| PSA Screening             | 0.174      | 2.95E-01              | -0.341    | 2.29E-196            |
| PTH                       | 0.093      | 2.99E-01              | -0.252    | 2.65E-92             |
| RBC                       | 0.145      | 0.00E+00              | 0.265     | 0.00E+00             |
| RDW                       | -0.024     | 3.19E-20              | -0.259    | 0.00E+00             |
| Sodium                    | 0.067      | 1.44E-182             | 0.102     | 0.00E+00             |
| T4                        | -0.047     | 4.06E-01              | -0.109    | 1.08E-44             |
| T4 Free                   | 0.039      | 6.30E-01              | -0.107    | 2.43E-24             |
| TIBC                      | 0.034      | 5.49E-01              | 0.194     | 5.13E-104            |
| Triglycerides             | 0.008      | 7.86E-01              | -0.138    | 0.00E+00             |
| Troponin                  | 0.040      | 4.84E-05              | -0.023    | 1.67E-01             |
| TSH                       | 0.026      | 4.27E-01              | -0.226    | 0.00E+00             |
| Uric Acid                 | -0.085     | 4.32E-18              | -0.118    | 7.23E-111            |
| Vitamin B <sub>12</sub>   | -0.150     | 8.43E-02              | 0.061     | 1.61E-06             |
| WBC                       | -0.097     | 0.00E+00              | -0.002    | 3.31E-01             |
